# Supplementary material for: Consonance Preferences Within an Unconventional Tuning System
Source: Oxford University Press journal article supplement (doi:10.1525/mp.2021.38.3.313), 2021-02-01
Supplement: 5_friedman_etal_supplementary_data.pdf [file 5_friedman_etal_supplementary_data.pdf]

| Chord | BHM      | HPHM     | SIM      |
|-------|----------|----------|----------|
| 1     | 0.075556 | 0.941573 | 0.43264  |
| 2     | 0.085714 | 1.018834 | 0.120392 |
| 3     | 0.238095 | 0.928665 | 0.083605 |
| 4     | 0.314286 | 0.953213 | 0.097481 |
| 5     | 0.033469 | 0.941246 | 0.078399 |
| 6     | 0.466667 | 1.079375 | 0.066259 |
| 7     | 0.288889 | 1.06949  | 0.14702  |
| 8     | 0.059592 | 0.958892 | 0.136863 |
| 9     | 0.2      | 0.97007  | 0.227477 |
| 10    | 0.428571 | 0.961436 | 0.084592 |
| 11    | 0.055238 | 1.077479 | 0.049576 |
| 12    | 0.146667 | 0.965988 | 0.144006 |
| 13    | 1        | 1.257816 | 0.010966 |

| Chord | BHM      | HPHM     | SIM      |
|-------|----------|----------|----------|
| 1     | 0.005122 | 0.73753  | 0.592712 |
| 2     | 0.014603 | 0.68201  | 0.422084 |
| 3     | 0.097566 | 0.62648  | 0.410423 |
| 4     | 0.002064 | 0.645262 | 0.418407 |
| 5     | 0.030519 | 0.702898 | 0.399369 |
| 6     | 0.087407 | 0.784021 | 0.427152 |
| 7     | 0.094422 | 0.707176 | 0.500873 |
| 8     | 0.013079 | 0.890392 | 0.484111 |
| 9     | 0.028995 | 0.650127 | 0.491512 |
| 10    | 0.085714 | 0.734298 | 0.388552 |
| 11    | 0.009817 | 0.650833 | 0.459229 |
| 12    | 0.075556 | 0.84598  | 0.389732 |
| 13    | 0.11619  | 0.68201  | 0.419871 |
| 14    | 0.022585 | 0.704021 | 0.234207 |
| 15    | 0.016054 | 0.686958 | 0.191986 |
| 16    | 0.100952 | 0.783731 | 0.183732 |
| 17    | 0.021376 | 0.871106 | 0.213841 |
| 18    | 0.004362 | 0.701572 | 0.239657 |
| 19    | 0.100952 | 0.758309 | 0.336809 |
| 20    | 0.098776 | 0.704671 | 0.250188 |
| 21    | 0.004154 | 0.770222 | 0.298025 |
| 22    | 0.032381 | 0.72278  | 0.250093 |
| 23    | 0.085714 | 0.93803  | 0.14689  |
| 24    | 0.063946 | 0.661745 | 0.373879 |
| 25    | 0.046531 | 0.688612 | 0.179924 |
| 26    | 0.098413 | 0.709404 | 0.143249 |
| 27    | 0.060317 | 0.704418 | 0.216936 |
| 28    | 0.012323 | 0.667511 | 0.196216 |
| 29    | 0.27619  | 0.731861 | 0.241598 |
| 30    | 0.092971 | 0.714411 | 0.208812 |
| 31    | 0.011701 | 0.714105 | 0.191971 |
| 32    | 0.031534 | 0.651623 | 0.288127 |
| 33    | 0.238095 | 0.851722 | 0.112618 |
| 34    | 0.009026 | 0.694023 | 0.356689 |
| 35    | 0.131429 | 0.784746 | 0.173578 |
| 36    | 0.390476 | 0.706979 | 0.209378 |
| 37    | 0.079184 | 0.65338  | 0.217405 |
| 38    | 0.056327 | 0.666788 | 0.267682 |
| 39    | 0.12381  | 0.747933 | 0.159812 |
| 40    | 0.075556 | 0.784697 | 0.184236 |
| 41    | 0.042032 | 0.880097 | 0.194572 |
| 42    | 0.314286 | 0.860373 | 0.186498 |
| 43    | 0.013878 | 0.744936 | 0.343305 |
| 44    | 0.008508 | 0.716283 | 0.23116  |
| 45    | 0.001739 | 0.638751 | 0.195281 |
| 46    | 0.04     | 0.66838  | 0.262397 |
| 47    | 0.0131   | 0.683762 | 0.150413 |

|    |          |          |          |
|----|----------|----------|----------|
| 48 | 0.00165  | 0.732956 | 0.131957 |
| 49 | 0.004444 | 0.713911 | 0.244331 |
| 50 | 0.033469 | 0.834725 | 0.134103 |
| 51 | 0.122963 | 0.784804 | 0.415079 |
| 52 | 0.025197 | 0.727889 | 0.215513 |
| 53 | 0.085714 | 0.731564 | 0.251325 |
| 54 | 0.542857 | 0.747754 | 0.148046 |
| 55 | 0.023746 | 0.920895 | 0.10892  |
| 56 | 0.182222 | 0.82771  | 0.175941 |
| 57 | 0.466667 | 0.962729 | 0.127968 |
| 58 | 0.077007 | 0.744732 | 0.439412 |
| 59 | 0.052698 | 0.75867  | 0.323407 |
| 60 | 0.115344 | 0.710386 | 0.207294 |
| 61 | 0.070476 | 0.787723 | 0.203524 |
| 62 | 0.03921  | 0.703362 | 0.269189 |
| 63 | 0.288889 | 0.966016 | 0.152045 |
| 64 | 0.010799 | 0.707766 | 0.472558 |
| 65 | 0.023673 | 0.704671 | 0.20949  |
| 66 | 0.072653 | 0.711106 | 0.168013 |
| 67 | 0.008044 | 0.656892 | 0.244006 |
| 68 | 0.059592 | 0.835147 | 0.138027 |
| 69 | 0.080272 | 0.688033 | 0.457336 |
| 70 | 0.010177 | 0.746229 | 0.26813  |
| 71 | 0.027302 | 0.655114 | 0.305855 |
| 72 | 0.2      | 0.859568 | 0.213378 |
| 73 | 0.022222 | 0.734129 | 0.363568 |
| 74 | 0.177143 | 0.721746 | 0.228363 |
| 75 | 0.428571 | 0.851634 | 0.116195 |
| 76 | 0.00756  | 0.778878 | 0.33637  |
| 77 | 0.055238 | 0.938453 | 0.097858 |
| 78 | 0.146667 | 0.845307 | 0.306327 |
